# Supplementary material for: Liquid harvesting and transport on multiscaled curvatures
Source: PubMed Central journal article supplement (PMC7519342; doi:10.1073/pnas.2011935117), 2020-09-08
Supplement: pnas.2011935117.sd01.pdf [file pnas.2011935117.sd01.pdf]

**Fig. 1H** Transport velocity of water condensation on different natural and artificial structures.

| Surfaces                                   | Transport velocity ( $\mu\text{m s}^{-1}$ ) |
|--------------------------------------------|---------------------------------------------|
| Natural cactus spine                       | ~ 13                                        |
| Artificial cactus spine                    | ~ 30                                        |
| Natural Spider silk                        | ~ 35                                        |
| Artificial Spider silk                     | ~ 21                                        |
| Natural <i>Sarracenia</i> trichome         | $11738 \pm 1411$                            |
| Artificial <i>Sarracenia</i> trichome      | $6931 \pm 766$                              |
| Concavity of <i>Nepenthes</i> peristome    | $7644 \pm 917$                              |
| Arch channel of <i>Nepenthes</i> peristome | $187443 \pm 6814$                           |
