# Supplementary material for: Liquid harvesting and transport on multiscaled curvatures
Source: PubMed Central journal article supplement (PMC7519342; doi:10.1073/pnas.2011935117), 2020-09-08
Supplement: pnas.2011935117.sd02.pdf [file pnas.2011935117.sd02.pdf]

**Fig. 2D** Plots of the water meniscus distance ( $x$ ) from the concavity tip measured in ( $B$ ) as a function of time ( $t$ ).

| $t$ (s) | $x$ ( $10^{-1}$ mm) |
|---------|---------------------|
| 8.0     | 5.5                 |
| 8.2     | 5.4                 |
| 8.4     | 5.4                 |
| 8.6     | 5.3                 |
| 8.8     | 5.3                 |
| 9.0     | 5.2                 |
| 9.2     | 5.2                 |
| 9.4     | 5.1                 |
| 9.6     | 5.0                 |
| 9.8     | 4.9                 |
| 10.0    | 4.8                 |
| 10.2    | 4.8                 |
| 10.4    | 4.8                 |
| 10.6    | 4.9                 |
| 10.8    | 5.0                 |
| 11.0    | 5.1                 |
| 11.2    | 5.1                 |
| 11.4    | 5.2                 |
| 11.6    | 5.3                 |
| 11.8    | 5.4                 |
| 12.0    | 5.3                 |
| 12.2    | 5.2                 |
| 12.4    | 5.1                 |
| 12.6    | 5.1                 |
| 12.8    | 5.0                 |
| 13.0    | 5.0                 |
| 13.2    | 4.9                 |
| 13.4    | 4.8                 |
| 13.6    | 4.8                 |
| 13.8    | 4.7                 |
| 14.0    | 4.8                 |
| 14.2    | 4.9                 |
| 14.4    | 5.0                 |
| 14.6    | 5.1                 |
| 14.8    | 5.1                 |
| 15.0    | 5.2                 |
| 15.2    | 5.3                 |
| 15.4    | 5.2                 |
| 15.6    | 5.1                 |
| 15.8    | 5.0                 |
| 16.0    | 4.9                 |
| 16.2    | 4.9                 |
| 16.4    | 4.8                 |
| 16.6    | 4.6                 |
| 16.8    | 4.6                 |
| 17.0    | 4.7                 |
| 17.2    | 4.8                 |
| 17.4    | 4.9                 |
| 17.6    | 4.9                 |
| 17.8    | 5.0                 |
| 18.0    | 5.1                 |
| 18.2    | 5.3                 |
| 18.4    | 5.1                 |
| 18.6    | 5.0                 |
| 18.8    | 4.9                 |
| 19.0    | 4.9                 |
| 19.2    | 4.8                 |
| 19.4    | 4.7                 |
| 19.6    | 4.5                 |
| 19.8    | 4.5                 |
| 20.0    | 4.4                 |
| 20.2    | 4.5                 |
| 20.4    | 4.5                 |
| 20.6    | 4.6                 |
| 20.8    | 4.8                 |
| 21.0    | 4.8                 |
| 21.2    | 4.9                 |
| 21.4    | 5.0                 |
| 21.6    | 4.9                 |
| 21.8    | 4.8                 |
| 22.0    | 4.7                 |
| 22.2    | 4.7                 |
| 22.4    | 4.6                 |
| 22.6    | 4.5                 |
| 22.8    | 4.4                 |
| 23.0    | 4.2                 |
| 23.2    | 4.1                 |
| 23.4    | 4.0                 |
| 23.6    | 3.9                 |
| 23.8    | 3.7                 |
| 24.0    | 3.8                 |
| 24.2    | 3.9                 |
| 24.4    | 4.1                 |
| 24.6    | 4.1                 |
| 24.8    | 4.2                 |
| 25.0    | 4.3                 |
| 25.2    | 4.4                 |
| 25.4    | 4.4                 |
| 25.6    | 4.3                 |
| 25.8    | 4.1                 |
| 26.0    | 4.1                 |
| 26.2    | 4.0                 |
| 26.4    | 3.8                 |
| 26.6    | 3.7                 |
| 26.8    | 3.5                 |
| 27.0    | 3.3                 |
| 27.2    | 3.1                 |
| 27.4    | 2.8                 |
| 27.6    | 2.6                 |
| 27.8    | 2.6                 |
| 28.0    | 2.7                 |
| 28.2    | 2.9                 |
| 28.4    | 3.0                 |
| 28.6    | 3.1                 |
| 28.8    | 3.2                 |
| 29.0    | 3.3                 |
| 29.2    | 3.5                 |
| 29.4    | 3.4                 |
| 29.6    | 3.3                 |
| 29.8    | 3.1                 |
| 30.0    | 2.9                 |
| 30.2    | 2.8                 |
| 30.4    | 2.6                 |
| 30.6    | 2.4                 |
| 30.8    | 2.2                 |
| 31.0    | 2.0                 |
| 31.2    | 1.8                 |
| 31.4    | 1.6                 |
| 31.6    | 1.2                 |
| 31.8    | 1.3                 |
| 32.0    | 1.3                 |
| 32.2    | 1.4                 |
| 32.4    | 1.5                 |
| 32.6    | 1.6                 |
| 32.8    | 1.8                 |
| 33.0    | 1.9                 |
| 33.2    | 2.0                 |
| 33.4    | 1.9                 |
| 33.6    | 1.7                 |
| 33.8    | 1.6                 |
| 34.0    | 1.3                 |
| 34.2    | 1.1                 |
| 34.4    | 0.9                 |
| 34.6    | 0.6                 |
| 34.8    | 0.4                 |
| 35.0    | 0.1                 |
| 35.2    | 0.0                 |
| 35.4    | 0.1                 |
| 35.6    | 0.2                 |
| 35.8    | 0.3                 |
| 36.0    | 0.4                 |
| 36.2    | 0.5                 |
| 36.4    | 0.3                 |
| 36.6    | 0.1                 |
| 36.8    | 0.0                 |
| 37.0    | 0.1                 |
| 37.2    | 0.2                 |
| 37.4    | 0.3                 |
| 37.6    | 0.4                 |
| 37.8    | 0.5                 |
| 38.0    | 0.3                 |
| 38.2    | 0.0                 |
| 38.4    | 0.0                 |
| 38.6    | 0.2                 |
| 38.8    | 0.3                 |
| 39.0    | 0.4                 |
| 39.2    | 0.4                 |
| 39.4    | 0.4                 |
| 39.6    | 0.2                 |
| 39.8    | 0.1                 |
| 40.0    | 0.0                 |
