# Supplementary material for: Liquid harvesting and transport on multiscaled curvatures
Source: PubMed Central journal article supplement (PMC7519342; doi:10.1073/pnas.2011935117), 2020-09-08
Supplement: pnas.2011935117.sd03.pdf [file pnas.2011935117.sd03.pdf]

**Fig. 2G** Individual condensate droplet weight with corresponding transport speed as a function of the condensation surface particular length on the dry and wet peristome surfaces.

| Surface   | State | Surface length, $L$ , (mm) | Weight of water, $w$ , (g) | Water transport velocity, $v$ , (mm/s) |
|-----------|-------|----------------------------|----------------------------|----------------------------------------|
| Ratchet   | Dry   | 0.41                       | 4.30E-08                   | 0.05                                   |
|           |       | 0.41                       | 5.70E-08                   | 0.07                                   |
|           |       | 0.41                       | 5.30E-08                   | 0.07                                   |
|           |       | 0.41                       | 7.10E-08                   | 0.13                                   |
|           |       | 0.41                       | 6.90E-08                   | 0.08                                   |
|           |       | 0.46                       | 5.20E-08                   | 0.03                                   |
|           |       | 0.46                       | 6.50E-08                   | 0.06                                   |
|           |       | 0.46                       | 6.90E-08                   | 0.11                                   |
|           |       | 0.46                       | 8.40E-08                   | 0.17                                   |
|           |       | 0.46                       | 7.20E-08                   | 0.15                                   |
|           |       | 0.48                       | 5.70E-08                   | 0.07                                   |
|           |       | 0.48                       | 5.20E-08                   | 0.04                                   |
|           |       | 0.48                       | 6.50E-08                   | 0.06                                   |
|           |       | 0.48                       | 6.90E-08                   | 0.07                                   |
|           |       | 0.48                       | 7.30E-08                   | 0.12                                   |
|           |       | 0.50                       | 7.50E-08                   | 0.15                                   |
|           |       | 0.50                       | 7.20E-08                   | 0.14                                   |
|           |       | 0.50                       | 5.90E-08                   | 0.08                                   |
|           | 0.50  | 6.20E-08                   | 0.07                       |                                        |
|           | 0.50  | 6.80E-08                   | 0.08                       |                                        |
|           | Wet   | 0.41                       | 3.60E-08                   | 2.25                                   |
|           |       | 0.41                       | 5.20E-08                   | 2.08                                   |
|           |       | 0.41                       | 5.50E-08                   | 1.22                                   |
|           |       | 0.41                       | 6.30E-08                   | 1.49                                   |
|           |       | 0.41                       | 4.90E-08                   | 1.39                                   |
|           |       | 0.46                       | 4.40E-08                   | 2.10                                   |
|           |       | 0.46                       | 5.50E-08                   | 2.32                                   |
|           |       | 0.46                       | 5.90E-08                   | 1.35                                   |
| 0.46      |       | 6.70E-08                   | 2.40                       |                                        |
| 0.46      |       | 6.20E-08                   | 1.97                       |                                        |
| Concavity | Dry   | 0.79                       | 6.30E-07                   | 0.27                                   |
|           |       | 0.79                       | 6.70E-07                   | 0.26                                   |
|           |       | 0.79                       | 7.70E-07                   | 0.30                                   |
|           |       | 0.79                       | 6.10E-07                   | 0.22                                   |
|           |       | 0.84                       | 6.80E-07                   | 0.32                                   |
|           |       | 0.84                       | 7.30E-07                   | 0.24                                   |
|           |       | 0.84                       | 7.50E-07                   | 0.33                                   |
|           |       | 0.84                       | 7.90E-07                   | 0.25                                   |
|           |       | 0.87                       | 8.10E-07                   | 0.30                                   |
|           |       | 0.87                       | 8.40E-07                   | 0.26                                   |
| Wet       | 0.79  | 6.20E-07                   | 6.20                       |                                        |
|           | 0.79  | 5.70E-07                   | 5.83                       |                                        |
|           | 0.79  | 6.30E-07                   | 4.69                       |                                        |
|           | 0.79  | 5.20E-07                   | 5.52                       |                                        |
|           | 0.84  | 5.30E-07                   | 4.94                       |                                        |
|           | 0.84  | 6.60E-07                   | 5.83                       |                                        |
|           | 0.84  | 6.90E-07                   | 4.59                       |                                        |
|           | 0.84  | 7.10E-07                   | 4.98                       |                                        |
|           | 0.87  | 6.30E-07                   | 5.21                       |                                        |
|           | 0.87  | 7.10E-07                   | 5.13                       |                                        |
| Arch      | Dry   | 8.97                       | 8.97                       | 8.97                                   |
|           |       | 9.33                       | 9.33                       | 9.33                                   |
|           |       | 9.42                       | 9.42                       | 9.42                                   |
|           |       | 9.84                       | 9.84                       | 9.84                                   |
|           |       | 10.46                      | 10.46                      | 10.46                                  |
|           |       | 10.59                      | 10.59                      | 10.59                                  |
|           |       | 11.03                      | 11.03                      | 11.03                                  |
|           | 11.36 | 11.36                      | 11.36                      |                                        |
|           | Wet   | 8.97                       | 2.85E-02                   | 184.24                                 |
|           |       | 9.33                       | 2.51E-02                   | 175.35                                 |
| 9.42      |       | 2.85E-02                   | 192.74                     |                                        |
| Wet       | 9.84  | 3.01E-02                   | 198.23                     |                                        |
|           | 10.46 | 2.86E-02                   | 183.51                     |                                        |
|           | 10.59 | 3.21E-02                   | 193.40                     |                                        |
|           | 11.03 | 3.59E-02                   | 188.84                     |                                        |
|           | 11.36 | 3.15E-02                   | 183.24                     |                                        |
