# Supplementary material for: Liquid harvesting and transport on multiscaled curvatures
Source: PubMed Central journal article supplement (PMC7519342; doi:10.1073/pnas.2011935117), 2020-09-08
Supplement: pnas.2011935117.sd04.pdf [file pnas.2011935117.sd04.pdf]

**Fig. 3D** Water harvest weight ( $w$ ) versus time ( $t$ ) for the water fog collected on the artificial peristome harvester.

| $t$ ( $\times 10^3$ s) | $w_{\text{Water}}$ (g) |
|------------------------|------------------------|
| 0.00                   | 0.00                   |
| 0.04                   | 0.06                   |
| 0.08                   | 0.10                   |
| 0.12                   | 0.56                   |
| 0.16                   | 2.01                   |
| 0.20                   | 3.28                   |
| 0.24                   | 4.12                   |
| 0.28                   | 5.18                   |
| 0.32                   | 6.11                   |
| 0.36                   | 6.88                   |
| 0.40                   | 7.63                   |
| 0.44                   | 8.58                   |
| 0.48                   | 9.66                   |
| 0.52                   | 10.35                  |
| 0.56                   | 11.36                  |
| 0.60                   | 12.47                  |
| 0.64                   | 13.00                  |
| 0.68                   | 14.16                  |
| 0.72                   | 15.37                  |
| 0.76                   | 16.54                  |
| 0.80                   | 17.77                  |
| 0.84                   | 18.34                  |
| 0.88                   | 19.78                  |
| 0.92                   | 20.62                  |
| 0.96                   | 22.09                  |
| 1.00                   | 22.88                  |
| 1.04                   | 24.17                  |
| 1.08                   | 25.76                  |
| 1.12                   | 26.22                  |
| 1.16                   | 26.39                  |
| 1.20                   | 27.75                  |
| 1.24                   | 28.44                  |
| 1.28                   | 30.14                  |
| 1.32                   | 31.05                  |
| 1.36                   | 31.78                  |
| 1.40                   | 32.95                  |
| 1.44                   | 34.15                  |
| 1.48                   | 35.35                  |
| 1.52                   | 36.66                  |
| 1.56                   | 38.22                  |
| 1.60                   | 39.35                  |
| 1.64                   | 41.25                  |
| 1.68                   | 41.82                  |
| 1.72                   | 43.07                  |
| 1.76                   | 43.91                  |
| 1.80                   | 45.89                  |
| 1.84                   | 47.20                  |
| 1.88                   | 48.02                  |
| 1.92                   | 49.73                  |
| 1.96                   | 50.49                  |
| 2.00                   | 50.96                  |
| 2.04                   | 52.41                  |
| 2.08                   | 53.60                  |
| 2.12                   | 54.77                  |
| 2.16                   | 55.66                  |
| 2.20                   | 56.56                  |
| 2.24                   | 58.40                  |
| 2.28                   | 58.84                  |
| 2.32                   | 60.17                  |
| 2.36                   | 61.10                  |
| 2.40                   | 61.73                  |
| 2.44                   | 63.67                  |
| 2.48                   | 64.70                  |
| 2.52                   | 67.22                  |
| 2.56                   | 68.49                  |
| 2.60                   | 69.40                  |
| 2.64                   | 70.58                  |
| 2.68                   | 70.92                  |
| 2.72                   | 72.11                  |
| 2.76                   | 73.00                  |
| 2.80                   | 74.86                  |
| 2.84                   | 75.79                  |
| 2.88                   | 76.69                  |
| 2.92                   | 77.57                  |
| 2.96                   | 78.47                  |
| 3.00                   | 78.73                  |
| 3.04                   | 80.28                  |
| 3.08                   | 81.83                  |
| 3.12                   | 84.11                  |
| 3.16                   | 85.05                  |
| 3.20                   | 85.98                  |
| 3.24                   | 86.87                  |
| 3.28                   | 87.75                  |
| 3.32                   | 89.36                  |
| 3.36                   | 90.95                  |
| 3.40                   | 91.50                  |
| 3.44                   | 92.40                  |
| 3.48                   | 93.29                  |
| 3.52                   | 95.68                  |
| 3.56                   | 98.07                  |
| 3.60                   | 100.45                 |
