# Supplementary material for: Liquid harvesting and transport on multiscaled curvatures
Source: PubMed Central journal article supplement (PMC7519342; doi:10.1073/pnas.2011935117), 2020-09-08
Supplement: pnas.2011935117.sd05.pdf [file pnas.2011935117.sd05.pdf]

**Fig. 3E** The water harvest weight ( $w$ ) versus time ( $t$ ) during the initial water condensation state.

| $t$ ( $\times 10^2$ s) | $w_{\text{Water}}$ (g) |
|------------------------|------------------------|
| 0                      | 0                      |
| 0.04                   | 0.01                   |
| 0.08                   | 0.02                   |
| 0.12                   | 0.03                   |
| 0.16                   | 0.03                   |
| 0.20                   | 0.04                   |
| 0.24                   | 0.04                   |
| 0.28                   | 0.04                   |
| 0.32                   | 0.05                   |
| 0.36                   | 0.05                   |
| 0.40                   | 0.06                   |
| 0.44                   | 0.06                   |
| 0.48                   | 0.06                   |
| 0.50                   | 0.06                   |
| 0.52                   | 0.07                   |
| 0.56                   | 0.07                   |
| 0.60                   | 0.07                   |
| 0.64                   | 0.08                   |
| 0.68                   | 0.08                   |
| 0.72                   | 0.08                   |
| 0.76                   | 0.09                   |
| 0.80                   | 0.10                   |
| 0.84                   | 0.10                   |
| 0.88                   | 0.11                   |
| 0.92                   | 0.13                   |
| 0.96                   | 0.14                   |
| 1.00                   | 0.15                   |
| 1.04                   | 0.27                   |
| 1.08                   | 0.38                   |
| 1.12                   | 0.42                   |
| 1.16                   | 0.45                   |
| 1.20                   | 0.56                   |
| 1.24                   | 0.69                   |
| 1.28                   | 0.76                   |
| 1.32                   | 0.88                   |
| 1.36                   | 1.00                   |
| 1.40                   | 1.13                   |
| 1.44                   | 1.26                   |
| 1.48                   | 1.46                   |
| 1.50                   | 1.63                   |
| 1.52                   | 1.75                   |
| 1.56                   | 1.88                   |
| 1.60                   | 2.01                   |
| 1.64                   | 2.15                   |
| 1.68                   | 2.27                   |
| 1.72                   | 2.40                   |
| 1.76                   | 2.53                   |
| 1.80                   | 2.66                   |
| 1.84                   | 2.79                   |
| 1.88                   | 2.91                   |
| 1.92                   | 3.03                   |
| 1.96                   | 3.15                   |
| 2.00                   | 3.28                   |
