# Supplementary material for: Liquid harvesting and transport on multiscaled curvatures
Source: PubMed Central journal article supplement (PMC7519342; doi:10.1073/pnas.2011935117), 2020-09-08
Supplement: pnas.2011935117.sd06.pdf [file pnas.2011935117.sd06.pdf]

Fig. 4D The long term usage of artificial water harvestor and artificial oleogel harvestor.

|         | Harvest velocity ( $\times 10^{-3} \text{ g cm}^{-2} \text{ s}^{-1}$ ) |                |                |                     |                     |                  |                  |                  |                  |                |                |
|---------|------------------------------------------------------------------------|----------------|----------------|---------------------|---------------------|------------------|------------------|------------------|------------------|----------------|----------------|
| $t$ (s) | water (40 °C)                                                          | water (60 °C)  | water (80 °C)  | isopropanol (25 °C) | isopropanol (40 °C) | kerosene (25 °C) | kerosene (40 °C) | gasoline (25 °C) | gasoline (40 °C) | glycol (25 °C) | glycol (40 °C) |
| 7200    | 6.1 $\pm$ 0.17                                                         | 6.3 $\pm$ 0.11 | 5.8 $\pm$ 0.13 | 4.2 $\pm$ 0.11      | 4.0 $\pm$ 0.11      | 3.7 $\pm$ 0.11   | 3.5 $\pm$ 0.09   | 3.4 $\pm$ 0.11   | 3.5 $\pm$ 0.10   | 2.5 $\pm$ 0.10 | 2.5 $\pm$ 0.12 |
| 36000   | 5.8 $\pm$ 0.14                                                         | 6.1 $\pm$ 0.12 | 5.8 $\pm$ 0.17 | 4.1 $\pm$ 0.09      | 3.9 $\pm$ 0.09      | 3.9 $\pm$ 0.09   | 3.6 $\pm$ 0.09   | 3.3 $\pm$ 0.12   | 3.4 $\pm$ 0.11   | 2.3 $\pm$ 0.11 | 2.5 $\pm$ 0.10 |
| 108000  | 5.9 $\pm$ 0.09                                                         | 6.1 $\pm$ 0.12 | 5.6 $\pm$ 0.21 | 4.2 $\pm$ 0.13      | 4.1 $\pm$ 0.12      | 3.8 $\pm$ 0.12   | 3.5 $\pm$ 0.10   | 3.4 $\pm$ 0.10   | 3.5 $\pm$ 0.09   | 2.4 $\pm$ 0.09 | 2.6 $\pm$ 0.11 |
| 216000  | 6.0 $\pm$ 0.13                                                         | 6.0 $\pm$ 0.17 | 5.7 $\pm$ 0.15 | 4.0 $\pm$ 0.10      | 4.1 $\pm$ 0.10      | 3.6 $\pm$ 0.10   | 3.5 $\pm$ 0.10   | 3.4 $\pm$ 0.11   | 3.3 $\pm$ 0.12   | 2.4 $\pm$ 0.10 | 2.5 $\pm$ 0.12 |
| 432000  | 6.0 $\pm$ 0.20                                                         | 6.1 $\pm$ 0.13 | 5.6 $\pm$ 0.19 | 4.1 $\pm$ 0.12      | 4.0 $\pm$ 0.11      | 3.6 $\pm$ 0.11   | 3.4 $\pm$ 0.09   | 3.3 $\pm$ 0.10   | 3.4 $\pm$ 0.11   | 2.3 $\pm$ 0.10 | 2.4 $\pm$ 0.11 |
