# Supplementary material for: Liquid harvesting and transport on multiscaled curvatures
Source: PubMed Central journal article supplement (PMC7519342; doi:10.1073/pnas.2011935117), 2020-09-08
Supplement: pnas.2011935117.sd07.pdf [file pnas.2011935117.sd07.pdf]

Fig. 4F Transport and harvest velocity of liquid condensation on different artificial structures.

| Substrate                 | Transport velocity (mm s <sup>-1</sup> ) | Harvest velocity (g cm <sup>-2</sup> s <sup>-1</sup> ) |
|---------------------------|------------------------------------------|--------------------------------------------------------|
| Artificial silk           | ~ 0.013                                  | ~ 9.50 × 10 <sup>-5</sup>                              |
|                           | ~ 0.35                                   | ~ 1.00 × 10 <sup>-2</sup>                              |
| Artificial spine          | ~ 0.02                                   | ~ 3.00 × 10 <sup>-3</sup>                              |
|                           | ~ 0.03                                   | ~ 1.30 × 10 <sup>-3</sup>                              |
|                           | ~ 116.70                                 | ~ 1.72 × 10 <sup>-4</sup>                              |
|                           | ~ 8.75                                   | ~ 1.3.0 × 10 <sup>-4</sup>                             |
|                           | ~ 0.33                                   | ~ 1.83 × 10 <sup>-3</sup>                              |
| Mesh                      | ~ 0.80                                   | ~ 8.00 × 10 <sup>-4</sup>                              |
|                           | ~ 0.40                                   | ~ 3.66 × 10 <sup>-4</sup>                              |
|                           | ~ 0.63                                   | ~ 3.10 × 10 <sup>-4</sup>                              |
|                           | ~ 4.00                                   | ~ 1.04 × 10 <sup>-3</sup>                              |
|                           | ~ 5.00                                   | ~ 8.33 × 10 <sup>-4</sup>                              |
| Slippery surface          | ~ 140.00                                 | ~ 2.54 × 10 <sup>-3</sup>                              |
|                           | ~ 0.15                                   | ~ 9.70 × 10 <sup>-5</sup>                              |
| Pitcher plant (This work) | ~ 0.03                                   | ~ 1.20 × 10 <sup>-4</sup>                              |
|                           | ~ 1,200.00                               | ~ 6.80 × 10 <sup>-2</sup>                              |
|                           | ~ 710.00                                 | ~ 4.20 × 10 <sup>-2</sup>                              |
|                           | ~ 640.00                                 | ~ 3.70 × 10 <sup>-2</sup>                              |
|                           | ~ 630.00                                 | ~ 3.40 × 10 <sup>-2</sup>                              |
|                           | ~ 380.00                                 | ~ 2.50 × 10 <sup>-2</sup>                              |
